# Supplementary material for: Genome analysis identifies the mutant genes for common industrial Silverblue and Hedlund white coat colours in American mink
Source: PubMed Central journal article supplement (PMC6418256; doi:10.1038/s41598-019-40918-7), 2019-03-14

*Genome analysis identifies the mutant genes for common industrial Silverblue and Hedlund white coat colours in American mink*

Andrey D. Manakhov<sup>1, 2, 3</sup> (orcid: 0000-0002-5163-8747)

Tatiana V. Andreeva<sup>1, 3</sup>

Oleg V. Trapezov<sup>4, 5</sup>

Nikolay A. Kolchanov<sup>2</sup> (orcid: 0000-0001-6800-8787)

Evgeny I. Rogaev<sup>1, 3, 6, 7</sup> \*

- 1) Department of Genomics and Human Genetics, Vavilov Institute of General Genetics, Russian Academy of Sciences, Moscow, 119991, Russia
- 2) Systems Biology Department, Institute of Cytology and Genetics, Siberian Branch of the Russian Academy of Sciences, Novosibirsk, 630090, Russia
- 3) Center for Genetics and Genetic Technologies, Faculty of Biology, Lomonosov Moscow State University, Moscow, 119234, Russia
- 4) Department of Animals and Human Genetics, Institute of Cytology and Genetics, Siberian Branch of the Russian Academy of Sciences, Novosibirsk, 630090, Russia
- 5) Novosibirsk State University, Novosibirsk, 630090, Russia
- 6) Center for Brain Neurobiology and Neurogenetics, Institute of Cytology and Genetics, Siberian Branch of the Russian Academy of Sciences, Novosibirsk, 630090, Russia
- 7) Department of Psychiatry, Brudnick Neuropsychiatric Research Institute, University of Massachusetts Medical School, Worcester, MA 01604, USA

\* Corresponding author ([rogaev@vigg.ru](mailto:rogaev@vigg.ru); Vavilov Institute of General Genetics, Russian Academy of Sciences, Moscow, 119333, Russia; tel: 8 (499) 135-50-61)

**Supplementary Table 1.** Results of sequencing American mink genomes. Statistics were calculated with samtools<sup>1</sup>, picard, and GATK<sup>2</sup> software, ferret genome (MusPutFur1.0) was used as reference.

| Sample     | Colour              | N of reads  | Mapped % | Duplicates % | Coverage* |
|------------|---------------------|-------------|----------|--------------|-----------|
| mink_3-261 | Standard dark brown | 266,270,413 | 96,18    | 4,41         | 10,04     |
| mink_3-247 | Standard dark brown | 257,506,707 | 97,64    | 3,06         | 9,78      |
| mink_3-265 | Standard dark brown | 235,071,238 | 96,77    | 2,56         | 9,14      |
| mink_1-663 | <i>p/p</i>          | 177,249,440 | 95,38    | 11,11        | 6,63      |
| mink_0-329 | <i>p/p</i>          | 170,946,890 | 97,18    | 3,43         | 6,54      |
| mink_9-431 | <i>p/p</i>          | 151,699,053 | 95,36    | 4,27         | 5,57      |
| mink_1-679 | <i>h/h</i>          | 140,973,939 | 95,14    | 4,38         | 5,29      |
| mink_1-725 | <i>h/h</i>          | 139,370,841 | 95,82    | 3,57         | 5,26      |
| mink_1-681 | <i>h/h</i>          | 136,213,566 | 94,09    | 3,27         | 5,02      |

1. Li, H. *et al.* The Sequence Alignment/Map format and SAMtools. *Bioinformatics* **25**, 2078–2079 (2009).
2. McKenna, A. *et al.* The genome analysis toolkit: A MapReduce framework for analyzing next-generation DNA sequencing data. *Genome Res.* **20**, 1297–1303 (2010).

Supplementary 2. Ferret *MITF* isoforms.

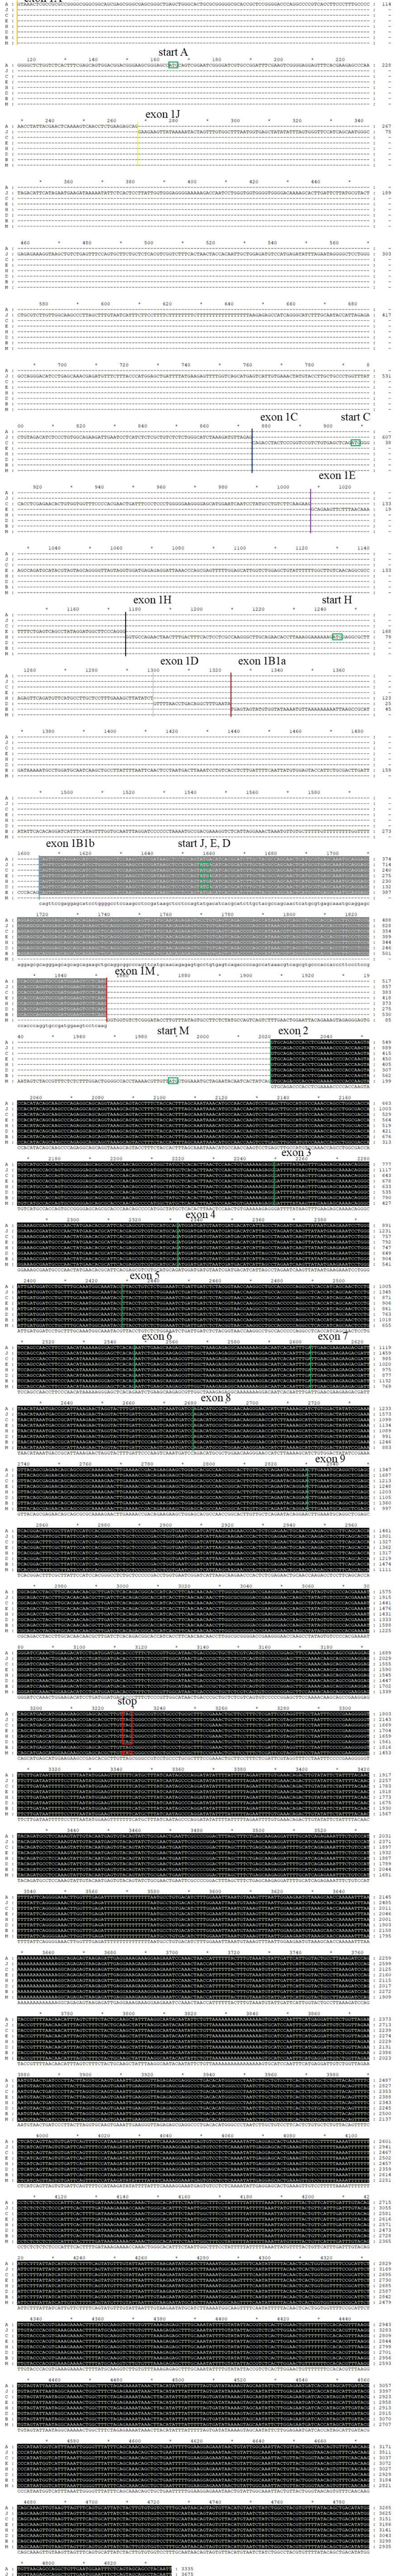

**Supplementary 3.** Original agarose gel electrophoresis of *MLPH* cDNA exons 6–9. M – 50 bp DNA Ladder (NEB, USA). Genotypes for GL896909.1:662639 G/A (*MLPH* C.901+1 G>A) mutation are presented.

M G/G G/G G/G A/A A/A A/A K-

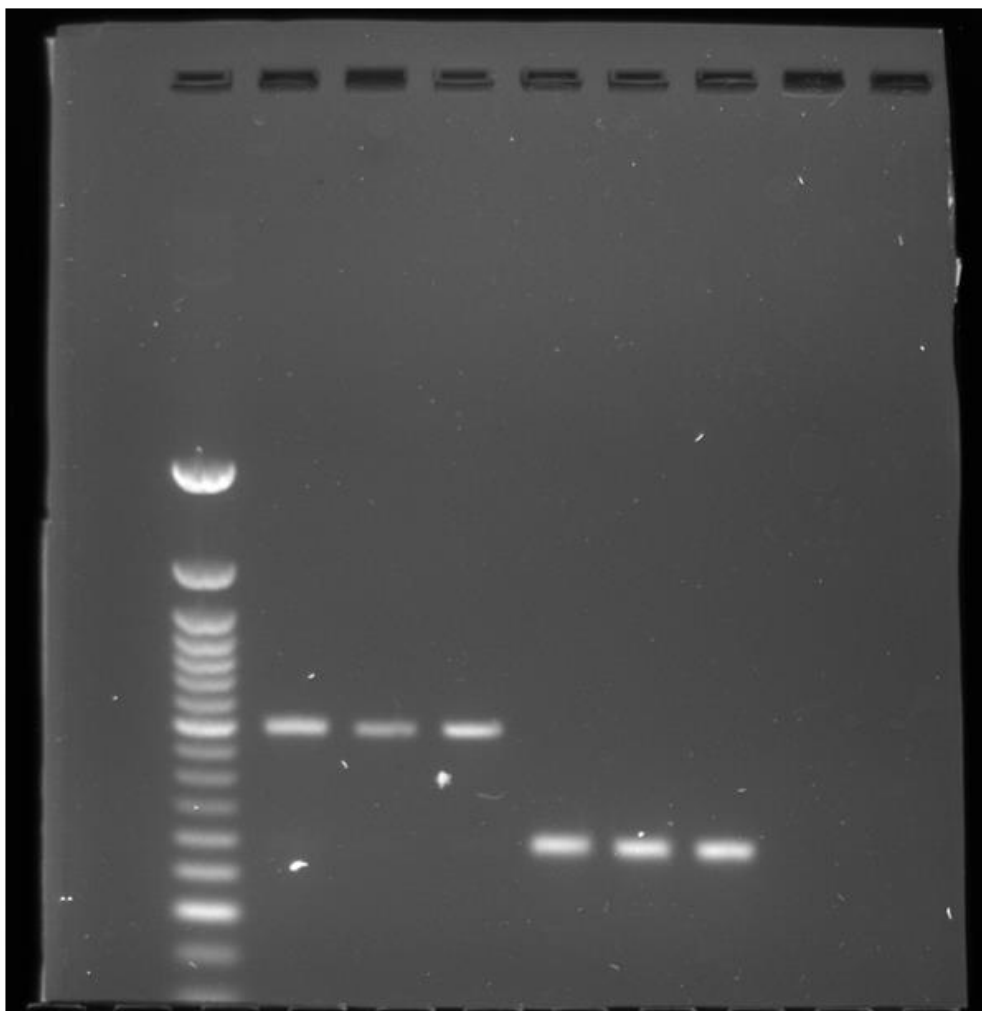

**Supplementary 4.** Original agarose gel electrophoresis of *MITF-M* cDNA 1M-2 exons and *B2M* cDNA 1–2 exons. No *MITF-M* cDNA 1–2 exons were observed in the cortex of Hedlund white (*h/h*) minks, which were homozygous for this mutation. M – DNA ladder 100 bp + 50 bp (SibEnzyme, Russia). Genotypes for GL896899.1:18635719 G/A (*MITF-M* C.33+1 G>A) mutation are presented.

M G/G G/G G/G A/A A/A A/A K-

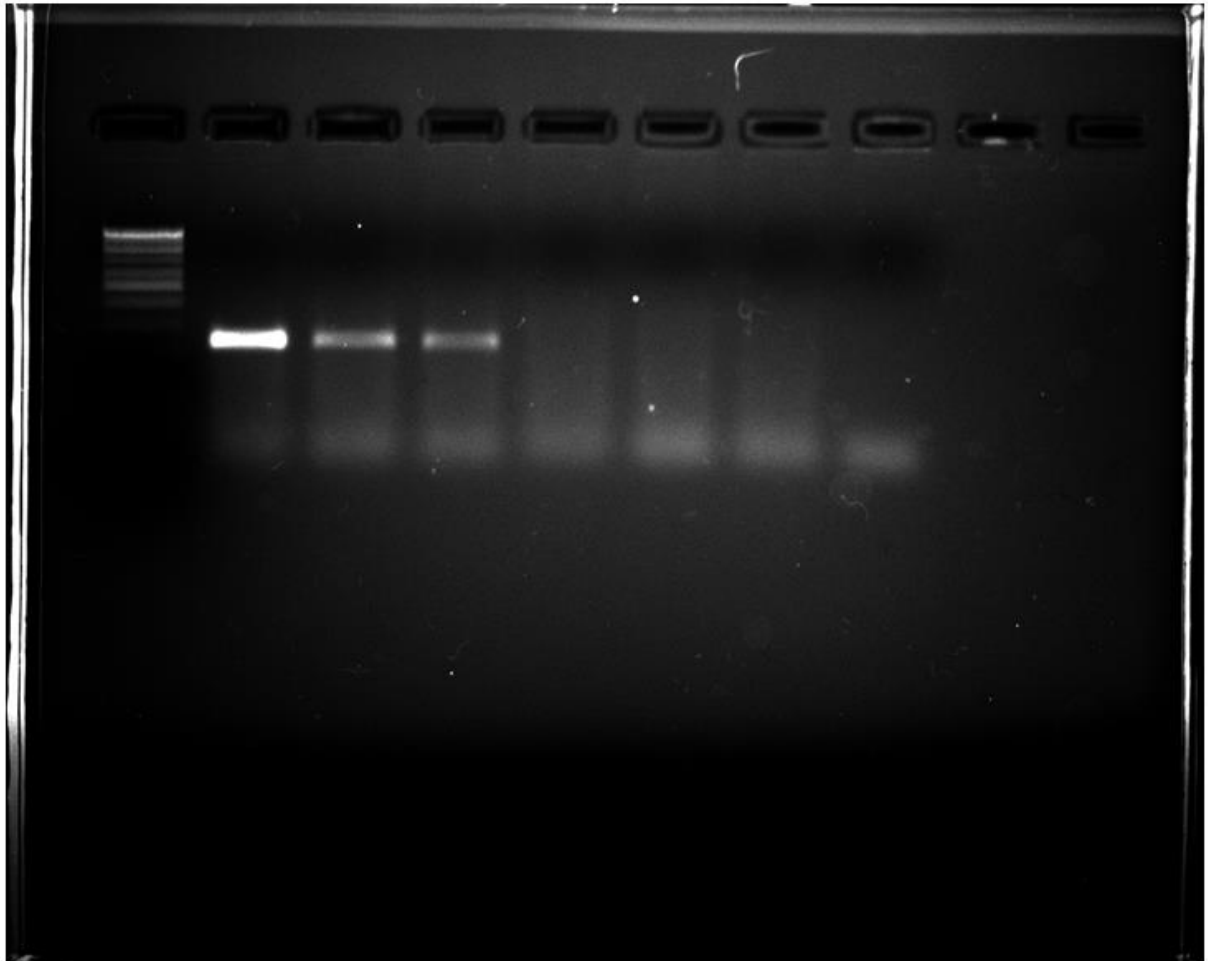

**Supplementary 5.** Original agarose gel electrophoresis of *B2M* cDNA 1–2 exons. 50 bp DNA Ladder (NEB). Genotypes for GL896899.1:18635719 G/A (MITF-M C.33+1 G>A) mutation are presented.

M G/G G/G G/G A/A A/A A/A K-

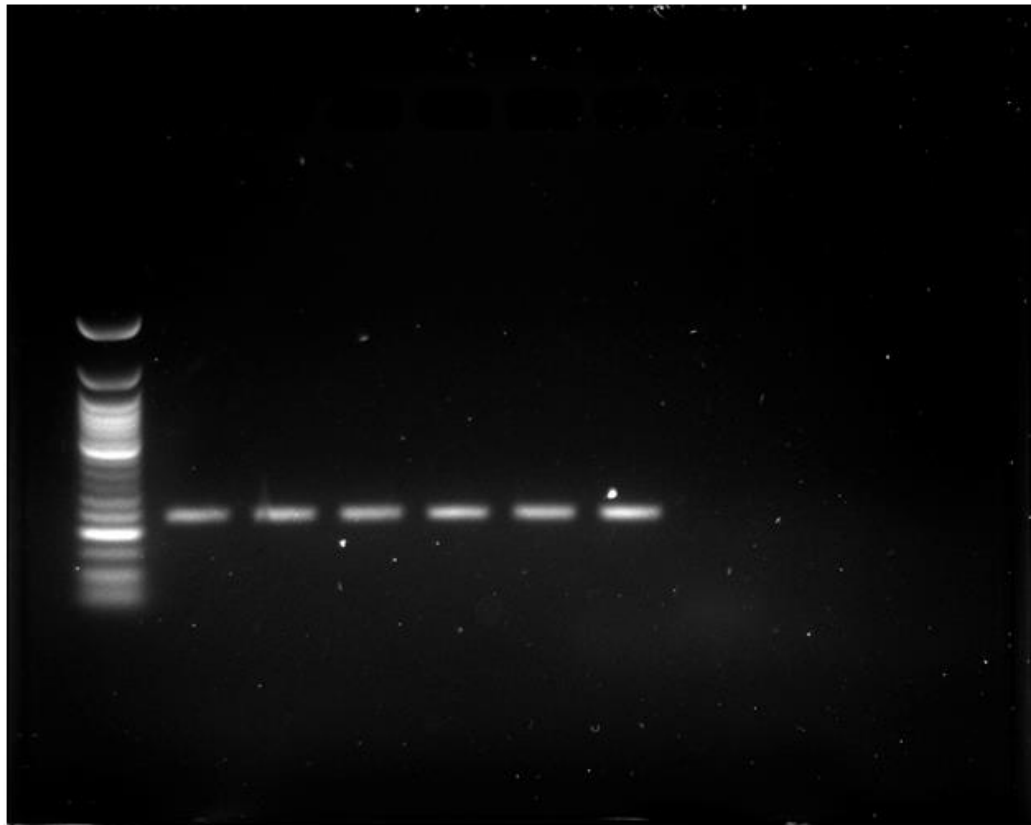

Supplement: 41598_2019_40918_MOESM2_ESM.pdf [file 41598_2019_40918_MOESM2_ESM.pdf]
